# Supplementary material
Source: PubMed Central journal article supplement (PMC7698990)
Supplement: Supp_Tables1-2.pdf [file Supp_Tables1-2.pdf]

## Supplementary Material

SUPPLEMENTARY TABLE S1. TRACK-TBI PHASE 1 BIOMARKER COHORT DEMOGRAPHIC AND CLINICAL VARIABLES

| Variable                    | Total TBI (n=1359)        | TBI, CT- (n=810)        | TBI, CT+ (n=549)        | Orthopedic controls (n=122)        |                  |
|-----------------------------|---------------------------|-------------------------|-------------------------|------------------------------------|------------------|
| Age (years)                 |                           |                         |                         |                                    |                  |
| Mean (SD)                   | 40.1 (17.0)               | 37.7 (15.9)             | 43.7 (17.9)             | 39.2 (15.0)                        |                  |
| Range                       | 17-90                     | 17-88                   | 17-90                   | 19-75                              |                  |
| Sex                         |                           |                         |                         |                                    |                  |
| Female                      | 435 (32.0%)               | 294 (36.3%)             | 435 (32.0%)             | 43 (35.3%)                         |                  |
| Male                        | 924 (68.0%)               | 516 (63.7%)             | 924 (68.0%)             | 79 (64.7%)                         |                  |
| Cause of injury             |                           |                         |                         |                                    |                  |
| Road traffic accident       | 815 (60.1%)               | 533 (65.8%)             | 282 (51.7%)             | 37 (36.3%)                         |                  |
| Incidental fall             | 336 (24.8%)               | 166 (20.5%)             | 170 (31.1%)             | 39 (38.2%)                         |                  |
| Violence/assault            | 97 (7.1%)                 | 42 (5.2%)               | 55 (10.1%)              | 1 (1.0%)                           |                  |
| Other                       | 108 (8.0%)                | 69 (8.5%)               | 39 (7.1%)               | 25 (24.5%)                         |                  |
| Injury severity             |                           |                         |                         |                                    |                  |
| GCS 3-8                     | 93 (7.3%)                 | 8 (1.0%)                | 85 (17.6%)              | 0 (0%)                             |                  |
| GCS 9-12                    | 48 (3.8%)                 | 8 (1.0%)                | 40 (8.3%)               | 0 (0%)                             |                  |
| GCS 13-15                   | 1137 (88.9%)              | 779 (98.0%)             | 358 (74.1%)             | 104 (100%)                         |                  |
| Prior TBI                   |                           |                         |                         |                                    |                  |
| No                          | 964 (71.0%)               | 534 (65.9%)             | 430 (78.5%)             | 91 (74.6%)                         |                  |
| Yes                         | 394 (29.1%)               | 276 (34.1%)             | 118 (21.5%)             | 31 (25.4%)                         |                  |
| Loss of consciousness       |                           |                         |                         |                                    |                  |
| No                          | 159 (11.8%)               | 102 (12.6%)             | 57 (10.5%)              | 109 (100%)                         |                  |
| Yes                         | 1051 (77.7%)              | 631 (78.0%)             | 420 (77.4%)             | 0 (0%)                             |                  |
| Suspected                   | 76 (5.6%)                 | 47 (5.8%)               | 29 (5.3%)               | 0 (0%)                             |                  |
| Unknown                     | 66 (4.9%)                 | 29 (3.6%)               | 37 (6.8%)               | 0 (0%)                             |                  |
| Post-traumatic amnesia      |                           |                         |                         |                                    |                  |
| No                          | 227 (16.8%)               | 170 (21.0%)             | 57 (10.5%)              | 109 (100%)                         |                  |
| Yes                         | 885 (65.6%)               | 537 (66.4%)             | 348 (64.3%)             | 0 (0%)                             |                  |
| Suspected                   | 86 (6.4%)                 | 21 (2.6%)               | 65 (12.0%)              | 0 (0%)                             |                  |
| Unknown                     | 152 (11.3%)               | 81 (10.0%)              | 71 (13.1%)              | 0 (0%)                             |                  |
| Alteration of consciousness |                           |                         |                         |                                    |                  |
| No                          | 208 (15.4%)               | 150 (18.5%)             | 58 (10.7%)              | 109 (100%)                         |                  |
| Yes                         | 962 (71.3%)               | 553 (68.4%)             | 409 (75.6%)             | 0 (0%)                             |                  |
| Suspected                   | 32 (2.4%)                 | 14 (1.7%)               | 18 (3.3%)               | 0 (0%)                             |                  |
| Unknown                     | 148 (11.0%)               | 92 (11.4%)              | 56 (10.4%)              | 0 (0%)                             |                  |
| Time to blood draw (h)      |                           |                         |                         |                                    |                  |
| Mean (SD)                   | 14.3 (6.6)                | 13.1 (6.8)              | 16.1 (5.8)              | 13.3 (7.3)                         |                  |
| <b>Biomarkers</b>           | <b>Total TBI (n=1359)</b> | <b>TBI, CT- (n=810)</b> | <b>TBI, CT+ (n=549)</b> | <b>Orthopedic controls (n=122)</b> |                  |
| GFAP (pg/mL)                |                           |                         |                         |                                    |                  |
| Median (IQR)                | 336 (69-1201)             | 116 (26-397)            | 1358 (472-3803)         | 13 (7-20)                          | <i>p</i> < 0.001 |
| S100B (µg/L)                |                           |                         |                         |                                    |                  |
| Median (IQR)                | 0.12 (0.07-0.24)          | 0.10 (0.06-0.18)        | 0.17 (0.09-0.38)        | 0.08 (0.06-0.13)                   | <i>p</i> < 0.001 |

Certain *ns* for subgroups may not add up to the total column *n* because of small amounts of missing data.

CT, computed tomography; GCS, Glasgow Coma Scale; GFAP, glial fibrillary acidic protein; IQR, interquartile range; S100B, S100 calcium-binding protein B; standard deviation; TBI, traumatic brain injury; TRACK-TBI, Transforming Research and Clinical Knowledge in Traumatic Brain Injury.

SUPPLEMENTARY TABLE S2. AREAS UNDER THE CURVE (AUC) FOR CT+ vs. CT- BY BIOMARKER SAMPLING TIME INTERVALS

| Time to blood draw | GFAP          |                  | S100B         |                  |
|--------------------|---------------|------------------|---------------|------------------|
|                    | n (CT-/CT+)   | AUC (95% CI)     | n (CT-/CT+)   | AUC (95% CI)     |
| 0-6 h              | 221 (188/33)  | 0.93 (0.88-0.98) | 206 (173/33)  | 0.77 (0.68-0.86) |
| 7-12 h             | 272 (169/103) | 0.81 (0.76-0.87) | 248 (151/97)  | 0.67 (0.60-0.74) |
| 13-18 h            | 365 (191/174) | 0.84 (0.80-0.88) | 353 (181/172) | 0.71 (0.65-0.76) |
| 19-24 h            | 478 (248/230) | 0.85 (0.82-0.88) | 457 (234/223) | 0.68 (0.63-0.73) |

Discriminability of GFAP and S100B by time interval post-injury are shown using receiver-operating characteristic (ROC) analysis, with respective AUCs shown.

CT, computed tomography; GFAP, glial fibrillary acidic protein; S100B, S100 calcium-binding protein B;
